# Supplementary material
Source: PubMed Central journal article supplement (PMC3064119)
Supplement: supp_00453.2010_tableS2.pdf [file supp_00453.2010_tableS2.pdf]

**Supplemental Data Table 2: CD45<sup>+</sup> cell reduction in CD24<sup>+</sup> fraction using FSC/SSC gating**

| Sample    | Percent in quadrant before gating   |                                     | Percent in quadrant after gating    |                                     |
|-----------|-------------------------------------|-------------------------------------|-------------------------------------|-------------------------------------|
|           | CD24 <sup>+</sup> CD45 <sup>-</sup> | CD24 <sup>+</sup> CD45 <sup>+</sup> | CD24 <sup>+</sup> CD45 <sup>-</sup> | CD24 <sup>+</sup> CD45 <sup>+</sup> |
| 1         | 0.74                                | 0.10                                | 0.71                                | 0.03                                |
| 2         | 1.32                                | 0.22                                | 1.04                                | 0.05                                |
| 3         | 0.66                                | 0.20                                | 0.60                                | 0.04                                |
| 4         | 1.20                                | 0.20                                | 0.99                                | 0.04                                |
| 5         | 0.82                                | 0.11                                | 0.75                                | 0.04                                |
| Mean ± SE | 0.94 ± 0.13                         | 0.15 ± 0.03                         | 0.82 ± 0.09                         | 0.04 ± 0.00                         |
