# Supplementary material
Source: PubMed Central journal article supplement (PMC3064119)
Supplement: supp_00453.2010_tableS3.pdf [file supp_00453.2010_tableS3.pdf]

**Supplemental Data Table 3: Percentage of CD24<sup>hi</sup> also EdU positive**

| Sample | CD24 <sup>hi</sup> EdU <sup>-</sup> | CD24 <sup>hi</sup> EdU <sup>+</sup> | Total CD24 <sup>hi</sup> | % EdU <sup>+</sup> |
|--------|-------------------------------------|-------------------------------------|--------------------------|--------------------|
| 1      | 0.37                                | 0.01                                | 0.38                     | 2.6                |
| 2      | 0.32                                | 0.01                                | 0.33                     | 3.0                |
| 3      | 0.19                                | 0.01                                | 0.20                     | 5.0                |
| 4      | 0.18                                | 0.00                                | 0.18                     | 0.0                |
|        |                                     |                                     | Mean ± SE                | 2.7 ± 1.0          |
