# Supplementary material
Source: PubMed Central journal article supplement (PMC3064119)
Supplement: supp_00453.2010_tableS4.pdf [file supp_00453.2010_tableS4.pdf]

**Supplemental Data Table 4: Percentage of CD24<sup>lo</sup> also EdU positive**

| Sample | CD24 <sup>lo</sup> EdU <sup>-</sup> | CD24 <sup>lo</sup> EdU <sup>+</sup> | Total CD24 <sup>lo</sup> | % EdU <sup>+</sup> |
|--------|-------------------------------------|-------------------------------------|--------------------------|--------------------|
| 1      | 0.35                                | 0.10                                | 0.45                     | 22.2               |
| 2      | 0.31                                | 0.07                                | 0.38                     | 18.4               |
| 3      | 0.34                                | 0.11                                | 0.45                     | 24.4               |
| 4      | 0.24                                | 0.04                                | 0.28                     | 14.2               |
|        |                                     |                                     | Mean ± SE                | 19.5 ± 2.2         |
