# Supplementary material
Source: PubMed Central journal article supplement (PMC3064119)
Supplement: supp_00453.2010_tableS5.pdf [file supp_00453.2010_tableS5.pdf]

**Supplemental Data Table 5: Percentage of CD24<sup>lo</sup> also lysozyme positive**

| <b>Sample</b> | <b>CD24<sup>lo</sup>Lys<sup>-</sup></b> | <b>CD24<sup>lo</sup>Lys<sup>+</sup></b> | <b>Total CD24<sup>lo</sup></b> | <b>% Lys<sup>+</sup></b> |
|---------------|-----------------------------------------|-----------------------------------------|--------------------------------|--------------------------|
| 1             | 0.27                                    | 0.13                                    | 0.40                           | 32.5                     |
| 2             | 0.24                                    | 0.10                                    | 0.34                           | 29.4                     |
| 3             | 0.26                                    | 0.10                                    | 0.36                           | 27.7                     |
|               |                                         |                                         | Mean ± SE                      | 29.8 ± 1.4               |
